# Supplementary material
Source: Springer Nature journal article supplement (https://www.springermedizin.de/resource/supplementary/12889_2014_6608_MOESM5_ESM.pdf/9498652)

95% IC CVRISC SCORE

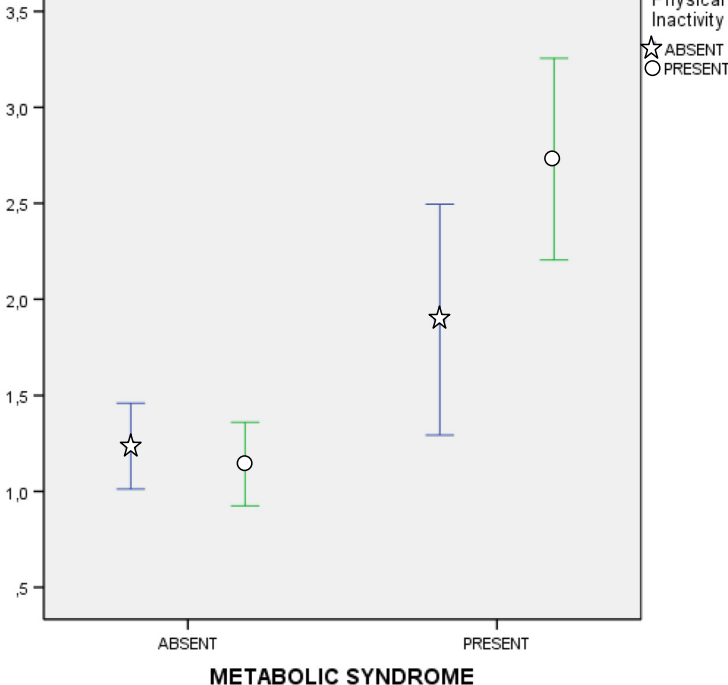

Supplement: MOESM5 [file 9498652]
